# Supplementary material
Source: PubMed Central journal article supplement (PMC4378165)
Supplement: supp_pp.114.254623_254623Supplemental_Figures.pdf [file supp_pp.114.254623_254623Supplemental_Figures.pdf]

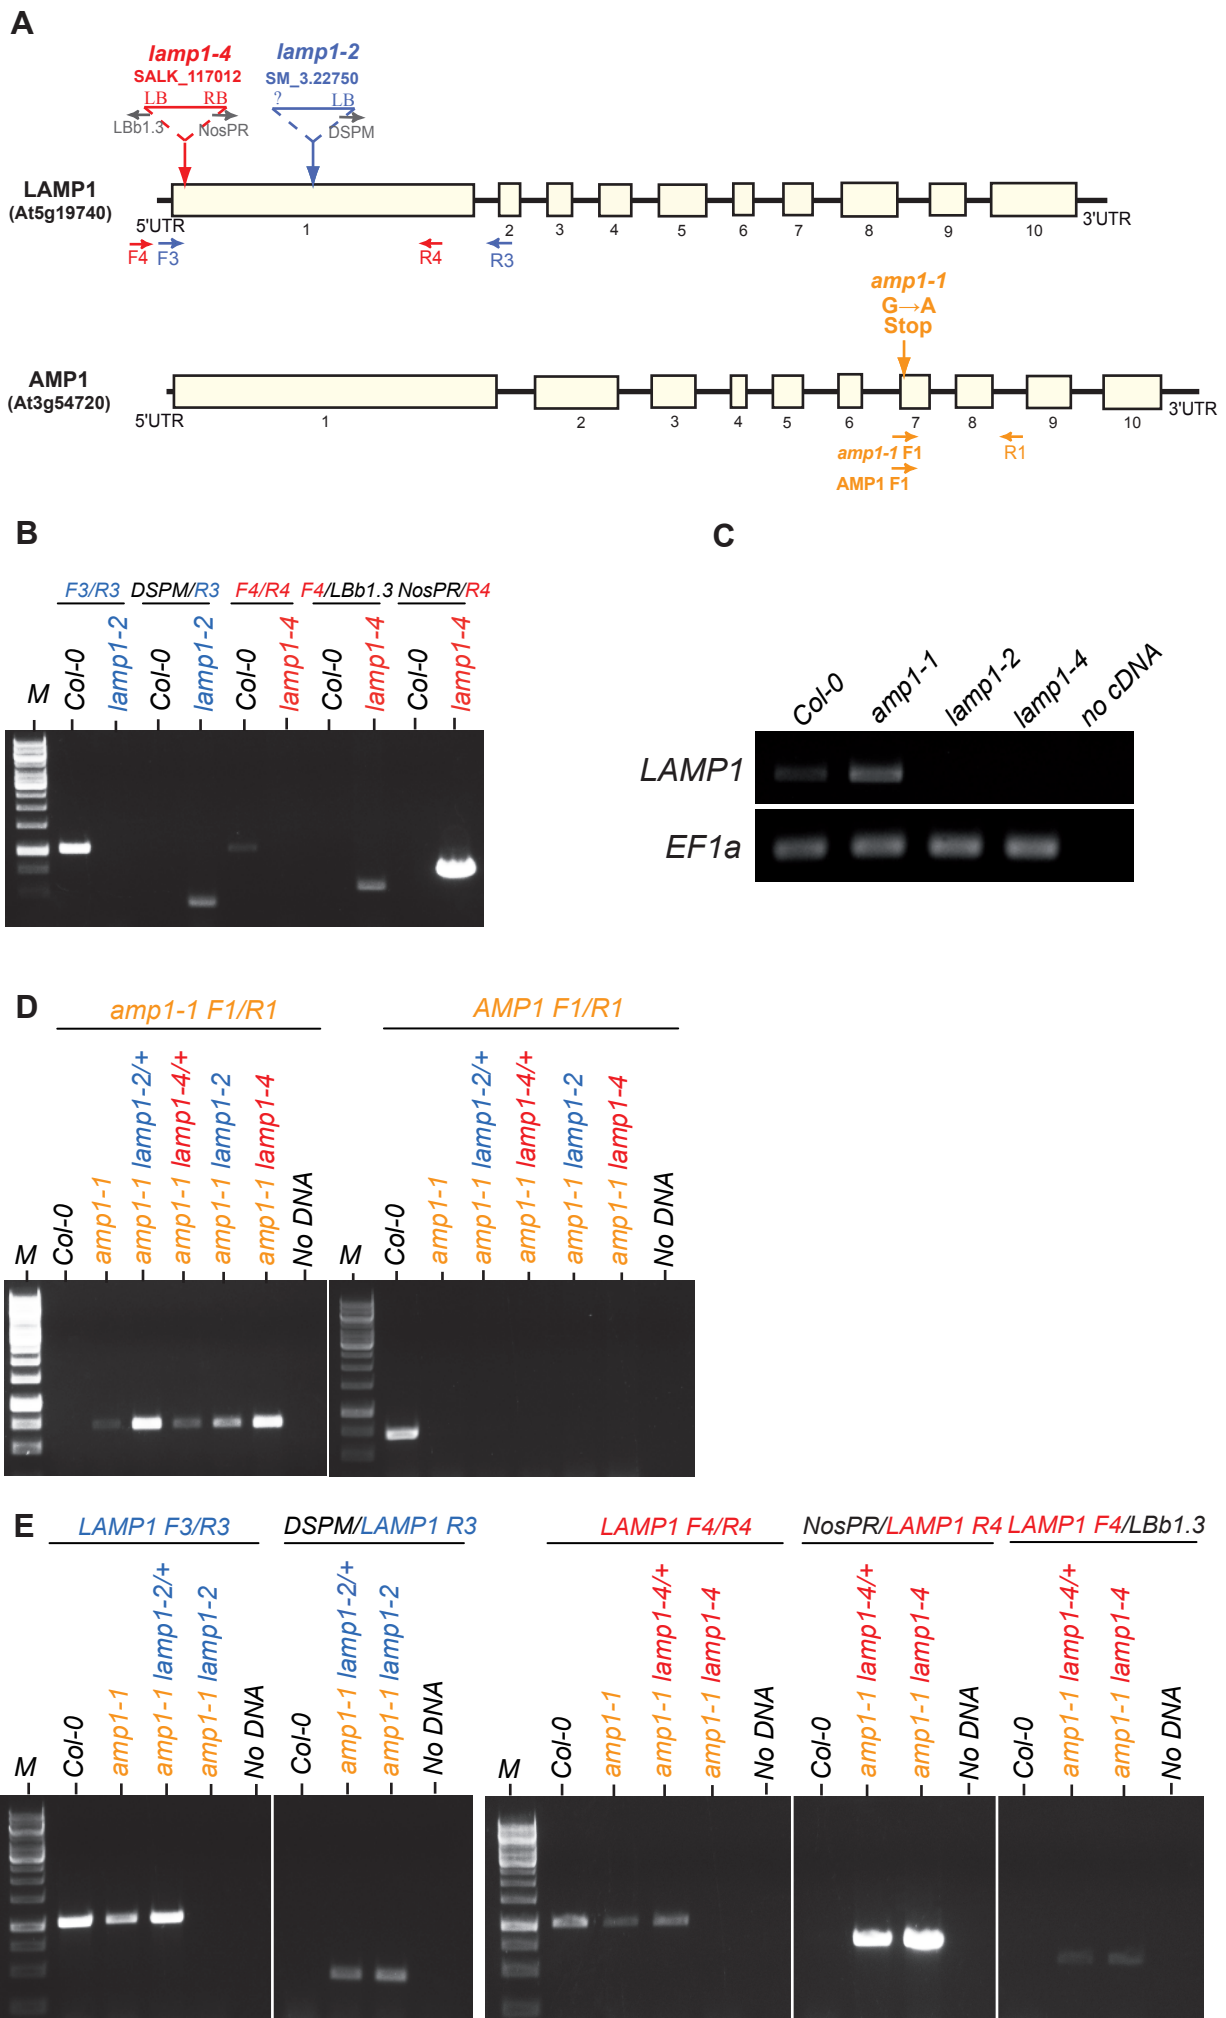

Figure S1

**Supplemental Figure S1. Genotypic characterization of *lamp1* and *amp1 lamp1* alleles.**

A, Positions of T-DNA insertions in *LAMP1* and localization of *amp1-1* point mutation in *AMP1*. Exons are drawn as yellow bars. Small arrows indicate positions of primers used in the genotyping experiments below. B, Verification of homozygous *lamp1-2* and *lamp1-4* lines by PCR genotyping. Used primer pairs are written on top of the panel. M, GeneRuler 1 kb DNA Ladder (Thermo Scientific). C, Detection of *LAMP1* transcripts in indicated genotypes by RT-PCR. In homozygous lines of *lamp1-2* and *lamp1-4* no *LAMP1*-specific cDNA could be amplified, whereas in *amp1-1* it's levels appeared to be slightly increased. *EF1 $\alpha$*  was used as normalization control. D, Verification of *amp1-1* homozygosity in analyzed *amp1 lamp1* double mutants by PCR-genotyping. Used primer pairs are written on top of the panel. The *amp1-1* F1 primer contains the mutated nucleotide A at the 3' position and thus amplifies only an *amp1-1* specific fragment (annealing temperature: 58°C), whereas the corresponding *AMP1* F1 primer consists of the wild-type sequence and is thus specific for the wild-type allele. E, Confirmation of presence of *lamp1* mutant alleles in analyzed *amp1-1 lamp1-2* and *amp1-1 lamp1-4* lines by PCR-genotyping. Used primer pairs are written on top of the panel.

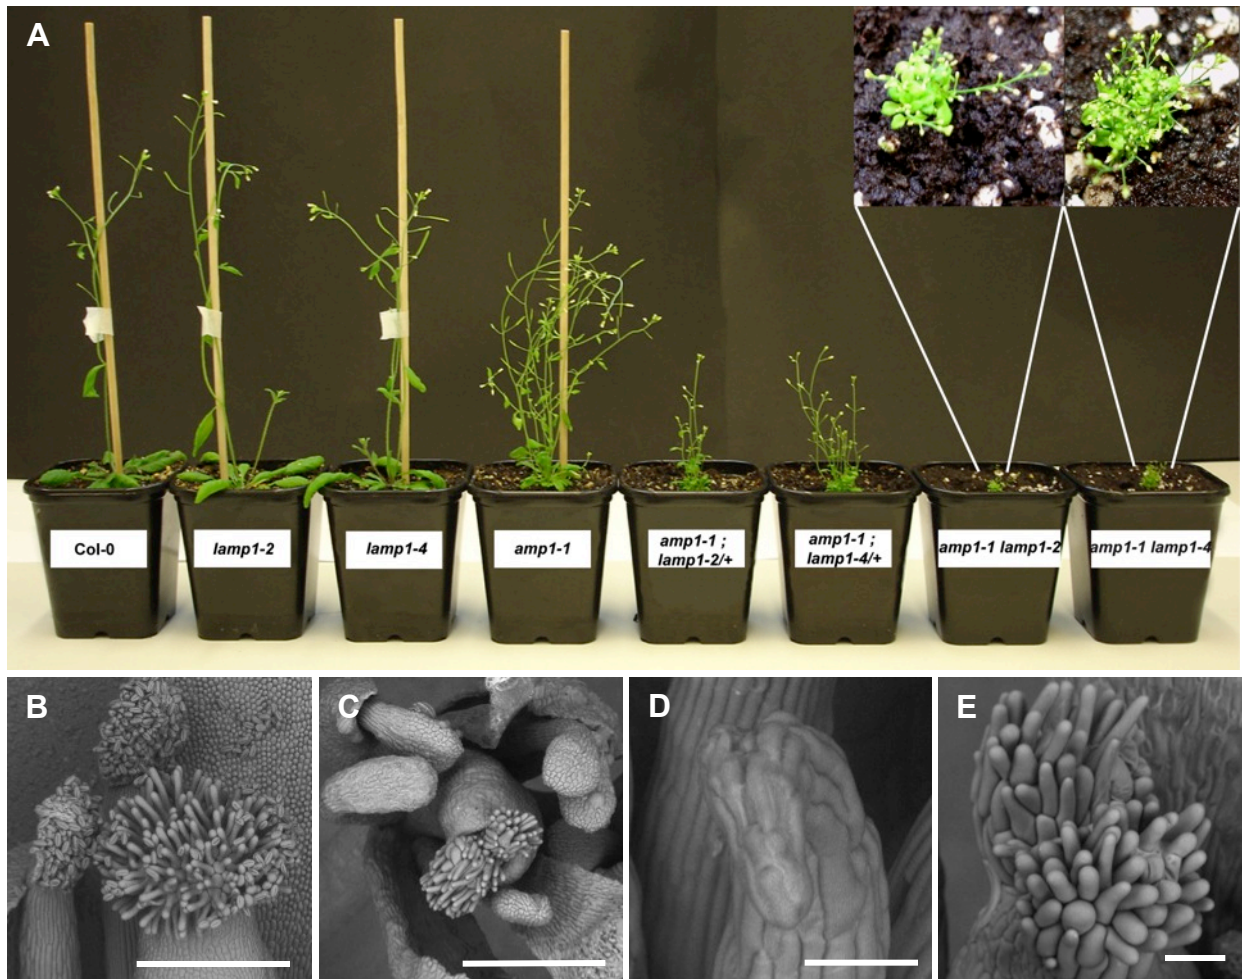

**Supplemental Figure S2. Adult phenotypes of *amp1 lamp1*.** A, Adult phenotypes of 35-day-old *amp1 lamp1*, the respective single mutants and wild-type. In both allelic combinations *amp1 lamp1*<sup>-/+</sup> plants show an intermediate phenotype between *amp1-1* and *amp1 lamp1*<sup>-/-</sup> indicating that *LAMP1* might act in a dosage-dependent manner. Close up of *amp1-1 lamp1*<sup>-/-</sup> plants (insets). B to E, SEM analysis of flower phenotypes of *amp1-1 lamp1-2*<sup>-/-</sup>. (B) Wild-type anthers and stigma. (C) *amp1-1 lamp1-2*<sup>-/-</sup> anthers and stigma. (D) Close up of a miss-developed filamentous *amp1-1 lamp1-2*<sup>-/-</sup> anther. (E) Close up of an *amp1-1 lamp1-2*<sup>-/-</sup> stigma. Size bars: (B and C), D 300  $\mu\text{m}$ ; (D and E) 50  $\mu\text{m}$ .

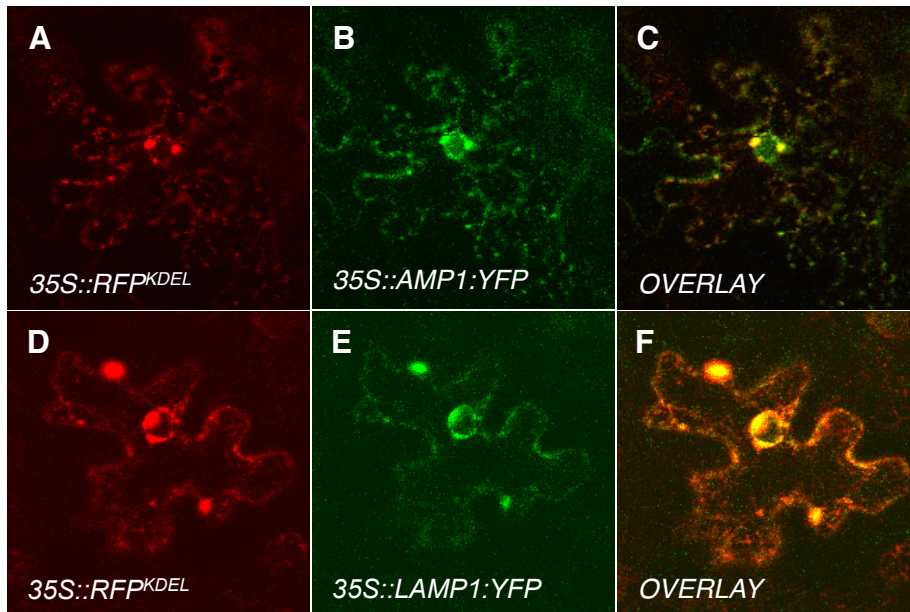

**Supplemental Figure S3. Subcellular localization of 35S::AMP1:YFP and 35S::LAMP1:YFP in *N. benthamiana* leaf epidermal cells.**

A to C, 35S::AMP1:YFP (B) co-localizes with the ER-marker 35S::RFP<sup>KDEL</sup> (A and C) attoto the endoplasmic reticulum and in the perinuclear environment. D to F, 35S::LAMP1:YFP (E) shows a very similar subcellular distribution as 35S::AMP1:YFP (B) and 35S::RFP<sup>KDEL</sup> (D, F) indicating that it also resides to in the nuclear envelope periphery and the ERthe endoplasmic reticulum.

Table S1. List of primers used in this study.

| Name                 | Sequence 5'-3'                         | Purpose         |
|----------------------|----------------------------------------|-----------------|
| WUSisf               | GCTCGTGAGCGTCAGAAG                     | in situ hybrid. |
| WUSisr               | GAAGCGTACGTCGATGTTC                    | in situ hybrid. |
| CLV3isf              | CACTCAGTCACTTTCTCTC                    | in situ hybrid. |
| CLV3isr              | GGTCAAGGGAGCTGAAAGTTG                  | in situ hybrid. |
| IPT3rtf              | TCCGTCCTAAACCGTGGAAAGC                 | RT-PCR          |
| IPT3rtr              | AGAGCCTCCACGTAAGAGTTGG                 | RT-PCR          |
| GAPC2rtf             | TTGGTGACAACAGGTCAAGCA                  | RT-PCR          |
| GAPC2rtr             | TTGGTGACAACAGGTCAAGCA                  | RT-PCR          |
| AMR1:GUSF            | GGGGTCGACAAACAGCGGTAGCATTGAG           | cloning         |
| AMR1::GUSR           | GCTGTGACCATCAATGGGGCTTCTTCTT           | cloning         |
| AMP1cDNAF (EcoRV)    | GGGGATATCATGTCCAAACCTCTCACCACCAG       | cloning         |
| AMP1cDNAR-ST (EcoRV) | GGGGATATCTCTGAAACCTCCTTTTAAGAGCTTTGC   | cloning         |
| AMR1cDNAF (EcoRV)    | CCAGATATCGAAGAAGCCCCATTGATGTCG         | cloning         |
| AMR1cDNAR-ST (EcoRV) | GATATCTATCAGTTCACCTTTTAAAACAAGTGAAGC   | cloning         |
| AMP1pF (BamHI)       | CCCGGATCCCCAGCTAGAGGGCTCAAAGCC         | cloning         |
| AMP1pR (KpnI/XhoI)   | GCCGGTACCCTCGAGTGCAGAGAGAGGAGAGTAAATTG | cloning         |
| AMP1RT-F             | GGAATTCTCTTGGCTGATGAGC                 | RT-PCR          |
| AMP1RT-R             | GTGAAACCTCCTTTAAGAGCTTTGC              | RT-PCR          |
| LAMP1RT-F            | ACATGTTGGTGTTCAGGAGT                   | RT-PCR          |
| LAMP1RT-R            | GACTCTCCAAATCTGGTGTGA                  | RT-PCR          |
| EF1 $\alpha$ F1      | CTGCTAACTTCACCTCCCAG                   | RT-PCR          |
| EF1 $\alpha$ R       | TGGTGGGTACTIONCAGAGAAGG                | RT-PCR          |
| AMP1F1               | TATCAGTGGCTGGAATTTGG                   | PCR-genotyping  |
| amp1-1F1             | TATCAGTGGCTGGAATTTGA                   | PCR-genotyping  |
| AMP1R                | GCTCTCTGAATCGCTCTTGC                   | PCR-genotyping  |
| LAMP1 F3             | AGCAAACAACCAACTCCATTG                  | PCR-genotyping  |
| LAMP1 F4             | AGTCGTTGGATCACCTAACCC                  | PCR-genotyping  |
| LAMP1 R3             | TAACAGTTTCCCCCTGAAACC                  | PCR-genotyping  |
| LAMP1 R4             | TGGTAAAAGCTGACAAATTAATGTTC             | PCR-genotyping  |
| DSPM                 | TACGAATAAGAGCGTCCATTTTAGAGTGA          | PCR-genotyping  |
| LBb1.3               | ATTTTGCCGATTTCCGGAAC                   | PCR-genotyping  |
| NosPr                | ACGTTGCGGTTCTGTTCAGTTCC                | PCR-genotyping  |
